# Supplementary material for: Smoking, and to a lesser extent non-combustible nicotine use, is associated with higher levels of alcohol consumption and risky drinking
Source: Springer Nature journal article supplement (doi:10.1038/s41598-025-89750-2), 2025-02-26
Supplement: MOESM1 [file 41598_2025_89750_MOESM1_ESM.pdf]

**Table S1.** Weighted sample characteristics

|                                                        | % <sup>1</sup> |
|--------------------------------------------------------|----------------|
| <b>All adults (n=188,787)</b>                          |                |
| Age                                                    |                |
| Mean (SD)                                              | 48.0 (18.6)    |
| 18-24                                                  | 12.3           |
| 25-34                                                  | 17.1           |
| 35-44                                                  | 16.4           |
| 45-54                                                  | 17.3           |
| 55-64                                                  | 14.7           |
| ≥65                                                    | 22.2           |
| Gender                                                 |                |
| Men                                                    | 48.9           |
| Women                                                  | 50.9           |
| Other                                                  | 0.3            |
| Missing                                                | 147            |
| Occupational social grade                              |                |
| ABC1 (more advantaged)                                 | 55.6           |
| C2DE (less advantaged)                                 | 44.4           |
| Region                                                 |                |
| North                                                  | 28.1           |
| Midlands                                               | 30.3           |
| South                                                  | 41.7           |
| AUDIT-C score, mean (SD)                               | 3.09 (2.90)    |
| Increasing and higher risk drinking                    |                |
| No                                                     | 71.0           |
| Yes                                                    | 29.0           |
| Smoking status                                         |                |
| Never                                                  | 61.7           |
| Former                                                 | 21.0           |
| Current                                                | 17.3           |
| Use of non-combustible nicotine                        |                |
| No                                                     | 91.2           |
| Yes                                                    | 8.8            |
| <b>Adults who engaged in risky drinking (n=53,710)</b> |                |
| ≥1 past-year alcohol reduction attempt                 |                |
| No                                                     | 71.2           |
| Yes                                                    | 28.8           |
| Missing                                                | 5,480          |

Table is continued on the next page.

**Table S1. continued**

|                                                                                                   | % <sup>1</sup> |
|---------------------------------------------------------------------------------------------------|----------------|
| <b>Adults who engaged in risky drinking and visited their GP in the past 12 months (n=31,815)</b> |                |
| Receipt of alcohol brief intervention                                                             |                |
| No                                                                                                | 97.1           |
| Yes                                                                                               | 2.9            |
| <b>Adults who currently smoked (n=31,730)</b>                                                     |                |
| Strength of urges to smoke                                                                        |                |
| Not at all                                                                                        | 14.8           |
| Slight                                                                                            | 18.4           |
| Moderate                                                                                          | 43.5           |
| Strong                                                                                            | 16.1           |
| Very strong                                                                                       | 5.0            |
| Extremely strong                                                                                  | 2.3            |
| Missing                                                                                           | 568            |
| <b>Adults who smoked in the past year (n=34,795)</b>                                              |                |
| ≥1 past-year attempt to quit smoking                                                              |                |
| No                                                                                                | 66.1           |
| Yes                                                                                               | 33.9           |
| Missing                                                                                           | 1,277          |

<sup>1</sup> Data are shown as weighted percentages, unless otherwise specified. Sample sizes (including numbers of missing cases) are unweighted.

**Table S2.** Alcohol consumption among adults in England who drink alcohol (AUDIT-C  $\geq 1$ ), by smoking status, use of non-combustible nicotine, and (among those who currently smoked) strength of urges to smoke

|                                 |                       | AUDIT-C score    |                      |                                              | Risky drinking (AUDIT-C ≥5) |                   |                                        |
|---------------------------------|-----------------------|------------------|----------------------|----------------------------------------------|-----------------------------|-------------------|----------------------------------------|
|                                 | <i>N</i> <sup>1</sup> | Mean [95%CI]     | <i>B</i> [95%CI]     | <i>B</i> <sub>adj</sub> [95%CI] <sup>2</sup> | % [95%CI]                   | OR [95%CI]        | OR <sub>adj</sub> [95%CI] <sup>2</sup> |
| All adults                      |                       |                  |                      |                                              |                             |                   |                                        |
| Smoking status                  |                       |                  |                      |                                              |                             |                   |                                        |
| Never                           | 79,436                | 3.95 [3.93–3.97] | Ref                  | Ref                                          | 34.4 [34.1–34.8]            | Ref               | Ref                                    |
| Former                          | 32,522                | 4.61 [4.58–4.64] | 0.66 [0.62; 0.69]    | 0.72 [0.68; 0.75]                            | 45.3 [44.7–45.9]            | 1.58 [1.53; 1.62] | 1.80 [1.75; 1.86]                      |
| Current                         | 21,877                | 5.23 [5.19–5.27] | 1.28 [1.24; 1.33]    | 1.11 [1.07; 1.16]                            | 55.4 [54.7–56.1]            | 2.36 [2.29; 2.44] | 2.22 [2.14; 2.30]                      |
| Use of non-combustible nicotine |                       |                  |                      |                                              |                             |                   |                                        |
| No                              | 122,434               | 4.23 [4.22–4.25] | Ref                  | Ref                                          | 39.1 [38.8–39.3]            | Ref               | Ref                                    |
| Yes                             | 11,401                | 5.24 [5.18–5.29] | 1.00 [0.95; 1.06]    | 0.24 [0.18; 0.30]                            | 55.6 [54.7–56.6]            | 1.96 [1.88; 2.04] | 1.15 [1.09; 1.21]                      |
| Adults who currently smoked     |                       |                  |                      |                                              |                             |                   |                                        |
| Strength of urges to smoke      |                       |                  |                      |                                              |                             |                   |                                        |
| Not at all                      | 3,439                 | 5.25 [5.15–5.36] | Ref                  | Ref                                          | 56.9 [55.1–58.7]            | Ref               | Ref                                    |
| Slight                          | 3,979                 | 5.16 [5.07–5.26] | -0.05 [-0.17; 0.07]  | 0.03 [-0.09; 0.15]                           | 55.7 [54.0–57.3]            | 0.97 [0.89; 1.06] | 1.03 [0.94; 1.13]                      |
| Moderate                        | 9,187                 | 5.10 [5.04–5.17] | -0.11 [-0.22; -0.01] | 0.08 [-0.02; 0.18]                           | 53.6 [52.5–54.7]            | 0.90 [0.84; 0.97] | 1.04 [0.96; 1.12]                      |
| Strong                          | 3,428                 | 5.33 [5.22–5.43] | 0.09 [-0.04; 0.23]   | 0.30 [0.17; 0.43]                            | 55.9 [54.1–57.7]            | 0.98 [0.89; 1.08] | 1.15 [1.04; 1.28]                      |
| Very strong                     | 1,001                 | 5.70 [5.49–5.92] | 0.47 [0.24; 0.70]    | 0.66 [0.44; 0.88]                            | 58.2 [54.9–61.5]            | 1.06 [0.91; 1.23] | 1.24 [1.06; 1.45]                      |
| Extremely strong                | 475                   | 6.61 [6.29–6.93] | 1.34 [1.01; 1.67]    | 1.46 [1.13; 1.78]                            | 70.0 [65.6–74.3]            | 1.74 [1.41; 2.15] | 2.10 [1.68; 2.63]                      |

CI, confidence interval. OR, odds ratio.

<sup>1</sup> Unweighted sample size.

<sup>2</sup> All models were adjusted for age, gender, occupational social grade, and survey year (modelled non-linearly using restricted cubic splines, three knots). Models with smoking status as the exposure were also adjusted for use of non-combustible nicotine. Models with use of non-combustible nicotine as the exposure were also adjusted for smoking status.

**Table S3.** Receipt of different types of advice on alcohol from a health professional within their GP surgery among adults in England who engaged in risky drinking and visited their GP, by smoking status and use of non-combustible nicotine

|                                                           |                | Advice received, % [95%CI] |                                                  |                                                                |                                                                         |                             |
|-----------------------------------------------------------|----------------|----------------------------|--------------------------------------------------|----------------------------------------------------------------|-------------------------------------------------------------------------|-----------------------------|
|                                                           | N <sup>1</sup> | Asked about my drinking    | Offered advice about cutting down on my drinking | Offered help or support within the surgery to help me cut down | Referred me to an alcohol service or advised me to seek specialist help | Did not discuss my drinking |
| Adults who engaged in risky drinking and visited their GP |                |                            |                                                  |                                                                |                                                                         |                             |
| Smoking status                                            |                |                            |                                                  |                                                                |                                                                         |                             |
| Never                                                     | 15,776         | 11.1 [10.6–11.6]           | 1.93 [1.70–2.16]                                 | 0.53 [0.40–0.65]                                               | 0.37 [0.26–0.47]                                                        | 86.9 [86.3–87.4]            |
| Former                                                    | 9,382          | 13.9 [13.2–14.7]           | 3.50 [3.09–3.91]                                 | 0.73 [0.53–0.92]                                               | 0.58 [0.41–0.75]                                                        | 83.2 [82.4–84.0]            |
| Current                                                   | 6,657          | 11.5 [10.7–12.3]           | 3.75 [3.28–4.23]                                 | 1.47 [1.17–1.76]                                               | 2.26 [1.87–2.65]                                                        | 83.8 [82.8–84.7]            |
| Use of non-combustible nicotine                           |                |                            |                                                  |                                                                |                                                                         |                             |
| No                                                        | 28,276         | 11.9 [11.5–12.3]           | 2.58 [2.38–2.77]                                 | 0.68 [0.57–0.78]                                               | 0.73 [0.62–0.84]                                                        | 85.4 [84.9–85.8]            |
| Yes                                                       | 3,539          | 12.5 [11.3–13.7]           | 4.25 [3.53–4.98]                                 | 1.63 [1.18–2.07]                                               | 1.65 [1.19–2.11]                                                        | 83.3 [81.9–84.6]            |

CI, confidence interval.

<sup>1</sup> Unweighted sample size.
